# Supplementary material for: Cytolytic circumsporozoite-specific memory CD4+ T cell clones are expanded during Plasmodium falciparum infection
Source: PubMed Central journal article supplement (PMC10673885; doi:10.1038/s41467-023-43376-y), 2023-11-25
Supplement: 41467_2023_43376_MOESM1_ESM.pdf [file 41467_2023_43376_MOESM1_ESM.pdf]

1 **Supplementary Information**

2

3 **Cytolytic circumsporozoite-specific memory CD4<sup>+</sup> T cell clones are expanded during**  
4 ***Plasmodium falciparum* infection**

5 Raquel Furtado,<sup>1#11</sup> Mahinder Paul,<sup>1#</sup> Jinghang Zhang,<sup>1</sup> Joowhan Sung,<sup>2</sup> Paul Karell,<sup>1</sup> Ryung S.  
6 Kim,<sup>3</sup> Sophie Caillat-Zucman,<sup>4</sup> Li Liang,<sup>5</sup> Philip Felgner,<sup>5</sup> Andy Bauleni,<sup>6</sup> Syze Gama,<sup>7</sup> Andrea  
7 Buchwald,<sup>8</sup> Terrie Taylor,<sup>7,9</sup> Karl Seydel,<sup>7,9</sup> Miriam Laufer,<sup>8</sup> Fabien Delahaye,<sup>10 12</sup> Johanna P.  
8 Daily,<sup>1,2\*</sup> Grégoire Lauvau<sup>1\*</sup>

9

10 <sup>1</sup>Department of Microbiology and Immunology, <sup>2</sup>Department of Medicine, <sup>3</sup>Department of  
11 Epidemiology and Population Health, <sup>10</sup>Department of Genetics, Albert Einstein College of  
12 Medicine, Bronx, New York, USA 10461

13 <sup>4</sup>Université de Paris, AP-HP, Hôpital Saint-Louis, Laboratoire d'Immunologie et  
14 Histocompatibilité, INSERM UMR976, 75010 Paris, France

15 <sup>5</sup>Department of Physiology and Biophysics, School of Medicine, University of California, Irvine,  
16 California, USA 92697.

17 <sup>6</sup>Malaria Alert Centre, Kamuzu University of Health Sciences, Blantyre, Malawi

18 <sup>7</sup>Blantyre Malaria Project, Kamuzu University of Health Sciences, Blantyre, Malawi

19 <sup>8</sup>Center for Vaccine Development and Global Health, University of Maryland School of  
20 Medicine, Baltimore, Maryland, USA 21201

21 <sup>9</sup>Department of Osteopathic Medical Specialties, Michigan State University, East Lansing,  
22 Michigan, USA 48824

23

24 **Supplementary Figures and Data**

25 Supplementary Figure 1, related to Figure 1.

26 Supplementary Figure 2, related to Figure 2.

27 Supplementary Figure 3, related to Figure 3 and 4.

28 Supplementary Figure 4, related to Figure 5.

29 Supplementary Figure 5, related to Figure 6.

30 Supplementary Figure 6, related to Figure 7.

31 Supplementary Data 1: List of IgG reactive *Pf* antigens.

32 Supplementary Data 2: List of *Pf*-reactive antigens between patient's groups.

33 Supplementary Data 3: List of IgG-specific *Pf* antigens with greater reactivity in protected  
34 compared to susceptible children.

35 Supplementary Data 4: List of antibodies for CyTOF, spectral flow cytometry and AIM assay.

36 Supplementary Data 5: List of expressed genes in naive and memory CD4<sup>+</sup> T cell clusters  
37 defined by single cell transcriptomic.

**A Participant enrollment characteristics by age**

| Variable                           | 1-5 yr (n=35)    | 6-12 yr (n=33)    | 13-50 yr (n=27)  | P value (ANOVA) |
|------------------------------------|------------------|-------------------|------------------|-----------------|
| Sex (% female)                     | 40               | 61                | 70               | <0.05†          |
| Temperature (°C)                   | 38.0 (36.7-39.1) | 38.1 (36.25-38.8) | 36.4 (35.9-36.6) | <0.0001         |
| Parasitemia (x10 <sup>3</sup> /μl) | 38.2 (15.9-79.9) | 18.86 (1.4-62.8)  | 0.88 (0.5-6.5)   | <0.0001         |
| Hemoglobin (g/dL)                  | 10.3 (9.3-11.7)  | 11.5 (10.8-12.2)  | 12.6 (10.9-1.0)  | <0.0001         |

\*Median and IQR  
† Chi-squared test

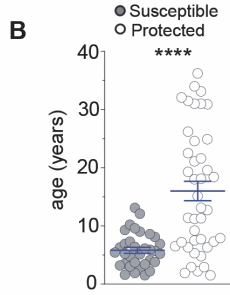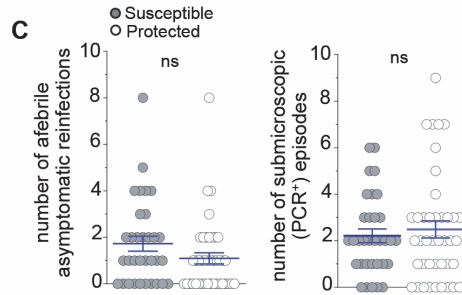

**D Participant enrollment characteristics by clinical immunity status and age**

| Variable                           | Susceptible, <13 yr (n=32) | Protected, <13 yr (n=20) | Protected, ≥13 yr (n=21) | P value (ANOVA) |
|------------------------------------|----------------------------|--------------------------|--------------------------|-----------------|
| Age, (yr)                          | 5.2 (3.3-7.2)              | 6.9 (3.4-8.9)            | 24.6 (18.9-31.3)         | NA              |
| Sex (% female)                     | 56                         | 30                       | 71                       | 0.027†          |
| Temperature (°C)                   | 38.4 (36.4-39.2)           | 38.0 (36.2-39.1)         | 36.3 (36.0-36.7)         | 0.002           |
| Parasitemia (x10 <sup>3</sup> /μl) | 32 (4.2-68)                | 21 (2.2-66)              | 0.7 (0.4-4.1)            | 0.003           |
| Hemoglobin (g/dL)                  | 10.7 (9.9-12.1)            | 11.4 (10.8-12.2)         | 12.8 (11.6-14.1)         | 0.001           |

\*Median and IQR  
† Chi-squared test

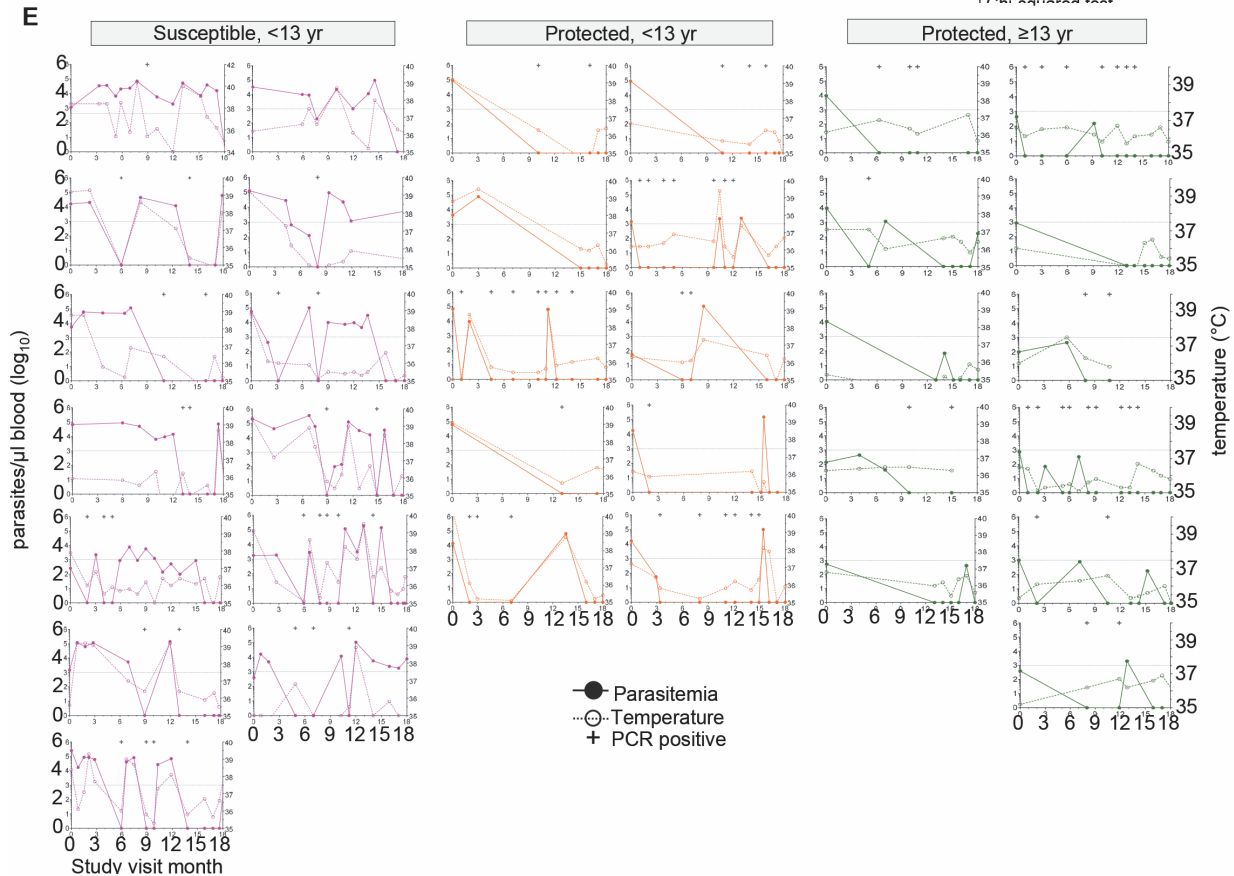

39 **Supplementary Figure 1. Clinical characteristics of the mild malaria cohort in the 18-**  
40 **month longitudinal study: (A)** Table with participant characteristics and clinical parameters at  
41 enrollment in the study, categorized by participants' age. Median and IQR values, and p-value  
42 determined by two-way ANOVA statistical analysis across participant's groups is indicated. **(B)**  
43 Average number of days between clinical reinfection episodes ( $>2,500$  parasites/ $\mu$ l blood) and  
44 age (years) of each participant that completed the study within the protected ( $\leq 1$  clinical  
45 reinfection,  $n=41$ ) and susceptible groups ( $\geq 3$  clinical reinfections,  $n=33$ ). **(C)** Number of  
46 afebrile asymptomatic reinfections ( $<2,500$  parasites/ $\mu$ l blood, temperature  $<37.5^{\circ}\text{C}$ ) and  
47 submicroscopic episodes (*Pf* PCR<sup>+</sup>) two sided Student's t-test was conducted between indicated  
48 groups, \* $p<0.05$ , \*\* $p<0.01$ , \*\*\* $p<0.001$ , \*\*\*\* $p<0.0001$ . **(D)** Table participant enrollment  
49 characteristics by clinical immunity status and age. **(E)** Parasitemia (left axis), temperature (right  
50 axis) and *Pf*PCR status of a subset of susceptible,  $<13$  yr, protected,  $<13$  yr and protected,  $\geq 13$   
51 yr at each clinical visit over the 18-month longitudinal study. Data are presented as  
52 means  $\pm$  SEM (B,C).

53

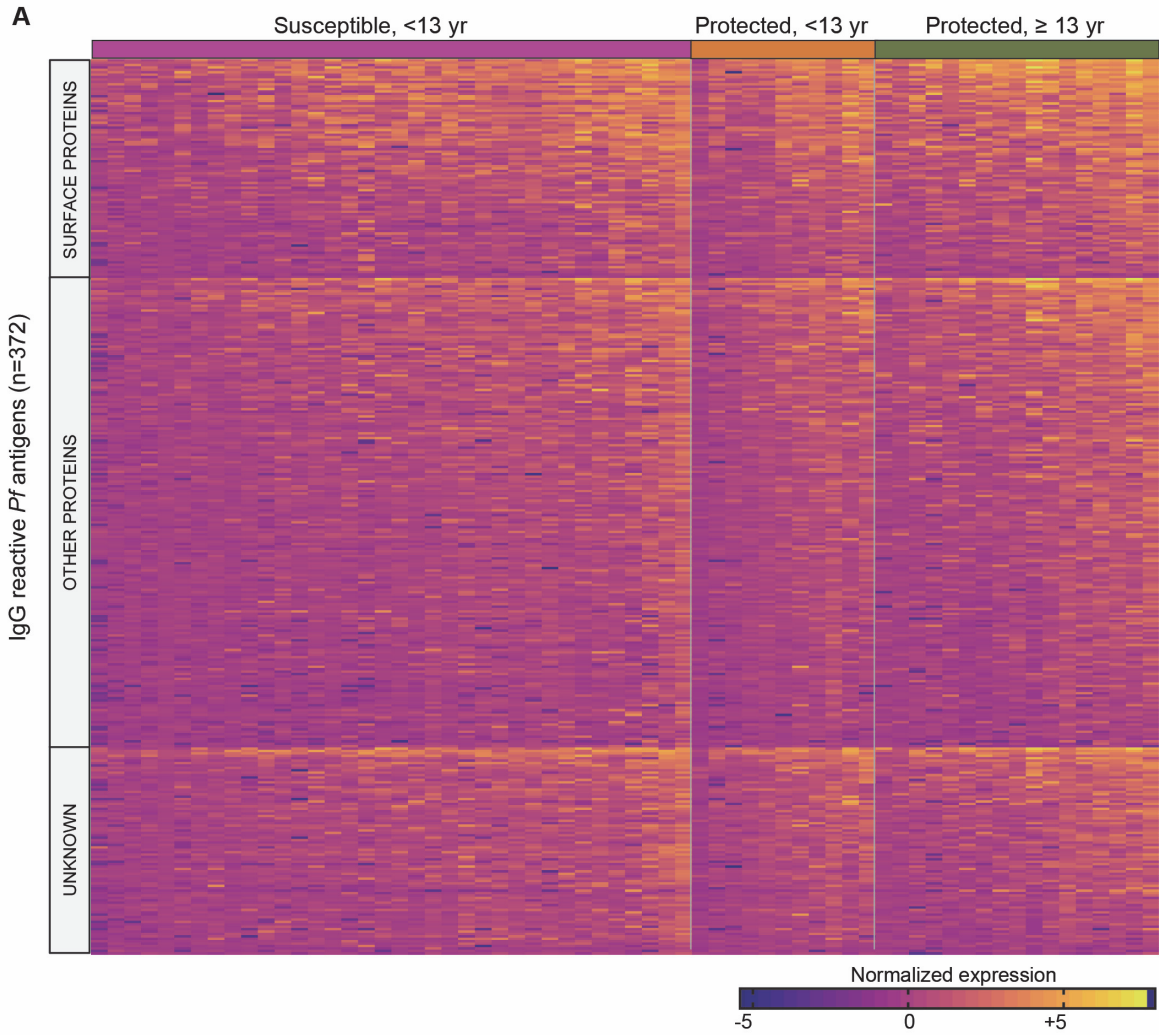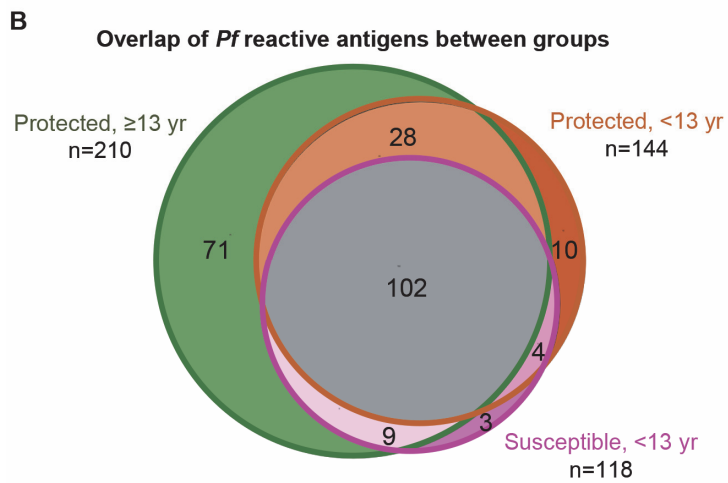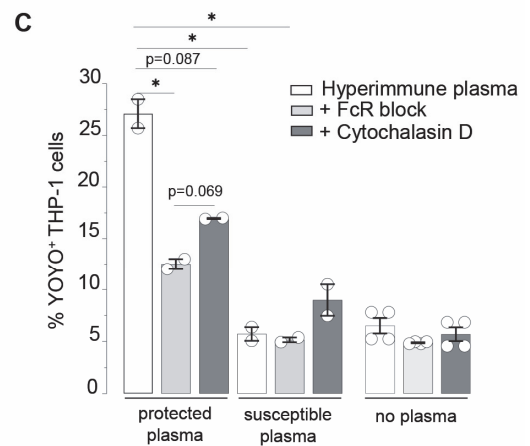

54

55 **Supplementary Figure 2. *Pf* specific antibody responses in participants determined by *Pf***

56 **antigen array: (A) Heatmap of normalized intensity of IgG reactivity to 372 *Pf* antigens (rows)**

57 in plasma from individual participants (columns) within susceptible, <13 yr, protected, <13 yr  
58 and protected,  $\geq 13$  yr groups during malaria illness. Surface and non-surface *Pf* antigens are  
59 indicated. **(B)** Venn diagram indicating overlapping *Pf* IgG reactivity to 372 *Pf* Ags by  
60 susceptible n=32, protected age-matched (n=20) and protected > 13 yr groups (n=21). Total *Pf*  
61 Ags recognized by each group is indicated next to the group label. **(C)** *Pf* merozoite opsonization  
62 assay with YOYO1<sup>+</sup> *Pf* merozoites incubated with or without indicated plasma (1:9 dilution,  
63 duplicate wells) and co-cultured with THP1 cells in the presence or absence of FcR block or  
64 Cytochalasin D (n=2). Mean and SEM of the % YOYO1<sup>+</sup> THP-1 cells are shown. Statistics is  
65 two sided Welch's unpaired t-test between indicated groups \*p<0.05. Data are presented as  
66 means  $\pm$  SEM (C).

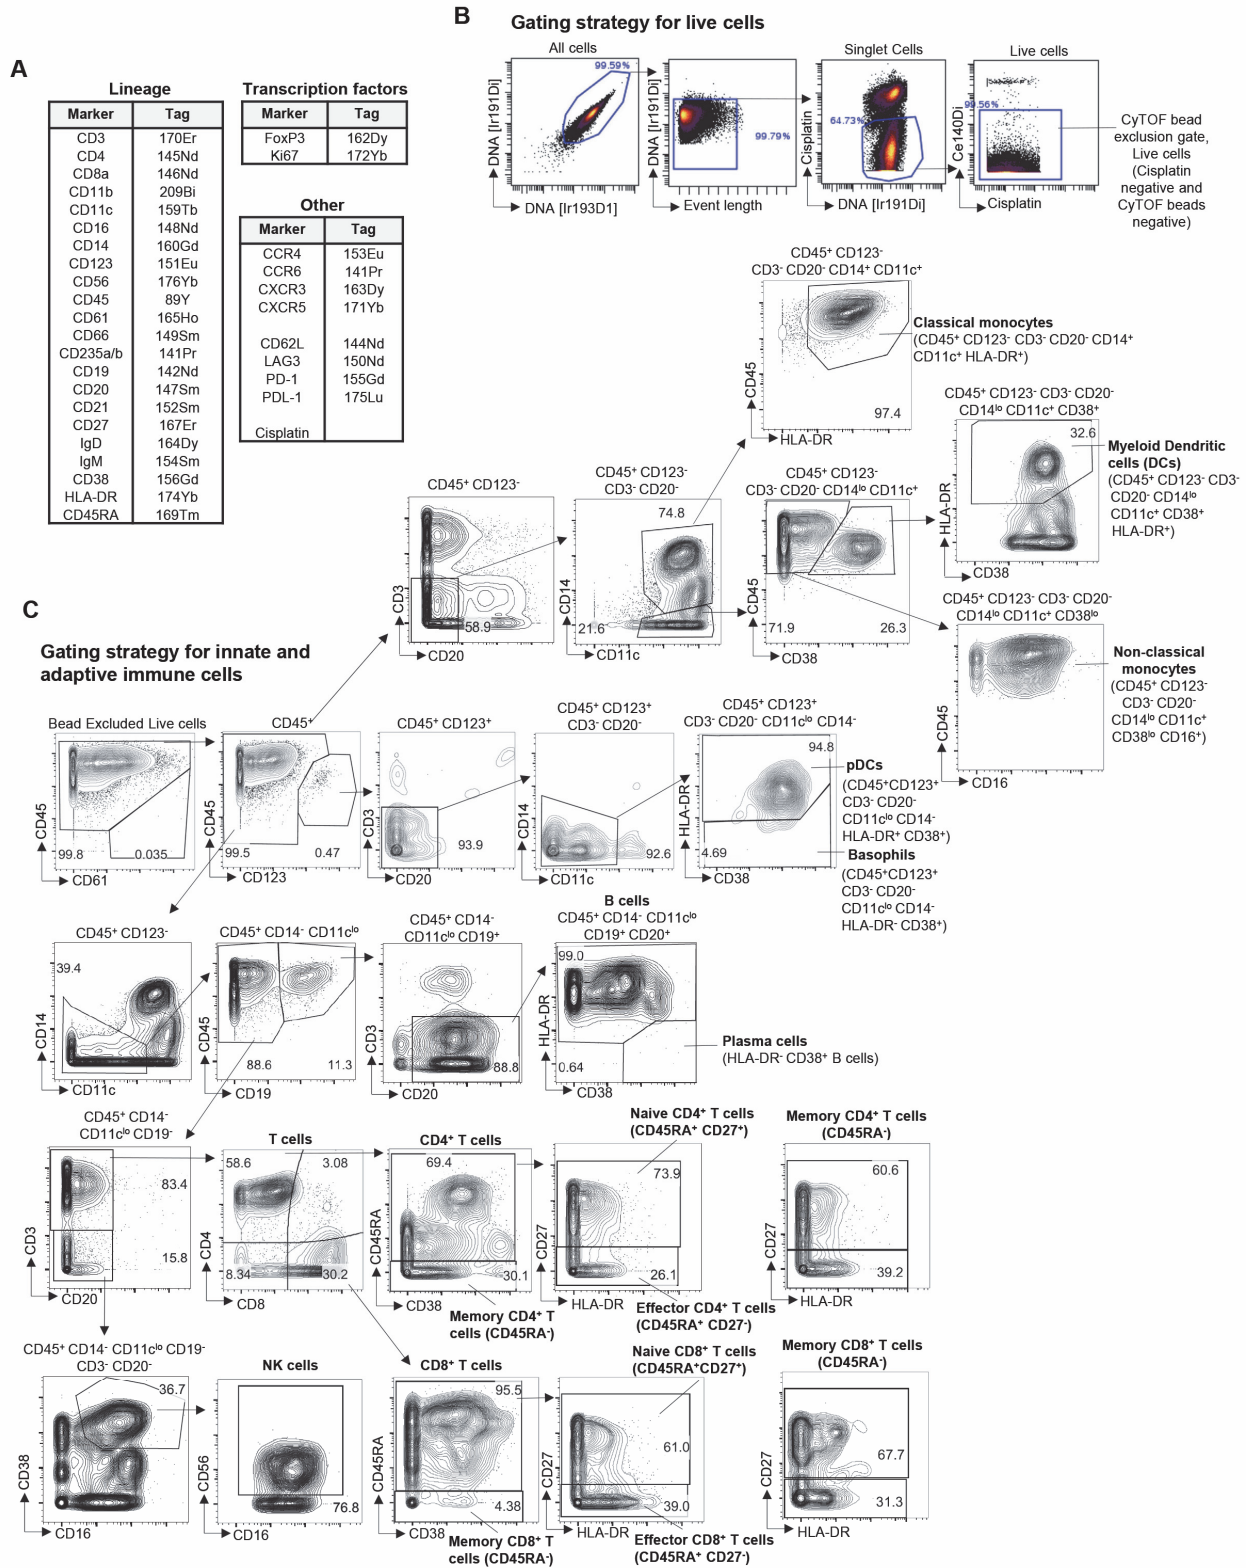

67

68 **Supplementary Figure 3. CyTOF immunophenotyping panel and gating strategy of**

69 **immune cell populations: (A) Participant PBMCs were immunophenotyped with a 33 marker**

70 mass cytometry antibody panel with indicated heavy-metal tags. **(B)** Gating strategy for live cells  
71 among PBMCs immunophenotyped by CyTOF. A density plot that is a representative sample  
72 during malaria illness is shown. **(C)** Contour plots with gating strategy for innate and adaptive  
73 immune cell populations among PBMCs stained with the antibody panel in (A).



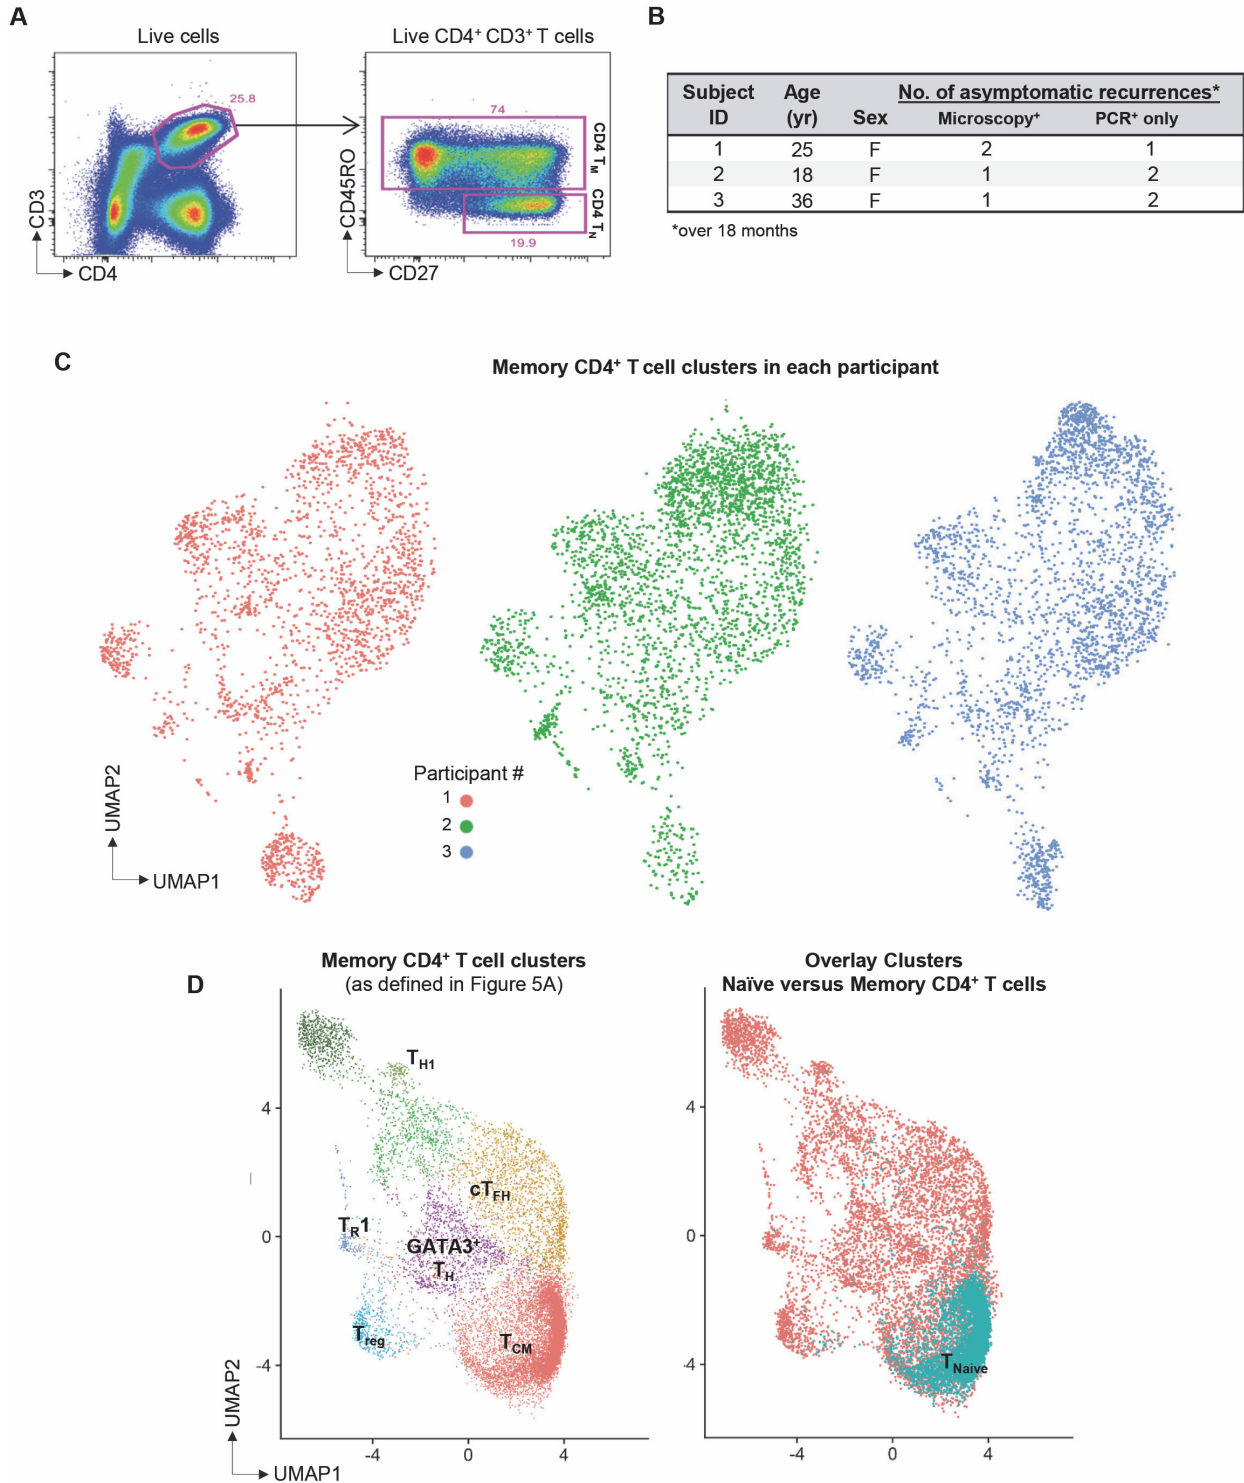

74

75 **Supplementary Figure 4. Single-cell (sc) transcriptomic analysis of memory and naïve**

76 **CD4<sup>+</sup> T cells from protected participants during malaria illness: (A)** Dot plots show the

77 gating strategy for sorting live (L/D aqua negative), memory (CD45RO<sup>+</sup>) and naïve (CD45RO<sup>-</sup>)

78 CD27<sup>+</sup> CD4<sup>+</sup> T cells on the BD Aria III for scRNA-seq analysis. **(B)** Table of the characteristics  
79 of the three protected participants from which PBMC were used for sc transcriptomic and TCR-  
80 seq. **(C)** UMAP visualization of scRNA-seq results on the memory CD4<sup>+</sup> T cells from each of  
81 the 3 protected participants during malaria infection. **(D)** UMAP visualization of scRNA-seq  
82 results on isolated naïve versus memory CD4<sup>+</sup> T cells from 3 protected participants during  
83 malaria infection. **(D)** UMAP visualizations of i) memory (CD45RO<sup>+</sup>) clusters as defined in  
84 Figure 5A (left) and ii) overlay of naïve and memory CD4<sup>+</sup> T cell distributions from the 3  
85 protected participants during malaria infection (right).

|               | TCR V $\alpha$  | CDR3 $\alpha$    | TCR V $\beta$ | CDR3 $\beta$       | Proportion (%) |
|---------------|-----------------|------------------|---------------|--------------------|----------------|
| Participant 1 | TRAV25          | CAGRAAGNKLTF     | TRBV6-3       | CASIHQQGLEAFF      | 4.35           |
|               | -               | -                | TRBV6-3       | CASIHQQGLEAFF      | 1.85           |
|               | TRAV12-3        | CAMSAGYGGSQGNLIF | TRBV27        | CASRAGHLYEQYF      | 1.25           |
|               | TRAV12-2        | CAANPEGNQFYF     | TRBV5-4       | CASSFGGSSSYEQYF    | 1.18           |
|               | TRAV20          | CAVHRGGGSQGNLIF  |               |                    |                |
|               | TRAV14DV4       | CAMRDGGGAQKLVF   | TRBV5-1       | CASSTGTGLNSGANVLTF | 1.11           |
|               | TRAV26-1        | CIVRVTPSWGKLQF   | TRBV7-2       | CASSLASGGYNEQFF    | 0.98           |
|               | TRAV9-2         | CARKNTGFQKLVF    | TRBV7-8       | CASSLDGTGSYEQYF    | 0.94           |
|               | TRAV29DV5       | CAASGNAGNMLTF    | TRBV7-9       | CASSRTSGWGNEQFF    | 0.91           |
|               | TRAV12-3        | CAMSAGYGGSQGNLIF |               |                    |                |
| TRAV41        | CAHPPYGSRLTF    | TRBV27           | CASRPGHYEQYF  | 0.54               |                |
| TRAV1-2       | CAVRDPTGGGNKLTF | TRBV29-1         | CSVEVGSKEYF   | 0.34               |                |
| Participant 2 | TRAV9-2         | CALSAKGAQKLVF    | TRBV5-1       | CASDLGHRDRAYEQYF   | 1.97           |
|               | -               | -                | TRBV5-1       | CASDLGHRDRAYEQYF   | 1.01           |
|               | TRAV4           | CLVGFMDTGRRALTF  | TRBV12-5      | CASGLGRTGTDYQYF    | 0.35           |
|               | TRAV2           | CAVRVGGYKLVF     | TRBV19        | CASSIDQGGGAVEQFF   | 0.32           |
|               | TRAV29DV5       | CASMDTGRRALTF    | TRBV6-5       | CASSYSATGPLHF      | 0.29           |
|               | -               | -                | TRBV19        | CASSIDQGGGAVEQFF   | 0.29           |
| Participant 3 | TRAV41          | CAVSNTGNQFYF     | TRBV5-5       | CASSLRGLDYEYQYF    | 2.39           |
|               | -               | -                | TRBV5-5       | CASSLRGLDYEYQYF    | 1.22           |
|               | TRAV12-1        | CASINFWAGTALIF   | TRBV3-1       | CASSQGLGAGNTIYF    | 0.74           |
|               | -               | -                | TRBV3-1       | CASSQGLGAGNTIYF    | 0.56           |
|               | TRAV1-2         | CASYQNFVF        | TRBV3-1       | CASSQGLGAGNTIYF    | 0.5            |
|               | TRAV8-2         | CVVSGISGNTPLVF   | TRBV3-1       | CASSQVAGANYGYTF    | 0.5            |
|               | TRAV1-2         | CAVRDPSSGSARQLTF | TRBV5-1       | CASSPVGAETQYF      | 0.33           |
|               | TRAV9-2         | CALSDQEAGTALIF   | TRBV2         | CASRGSTQYQETQYF    | 0.33           |
|               | -               | -                | TRBV3-1       | CASSQVAGANYGYTF    | 0.28           |

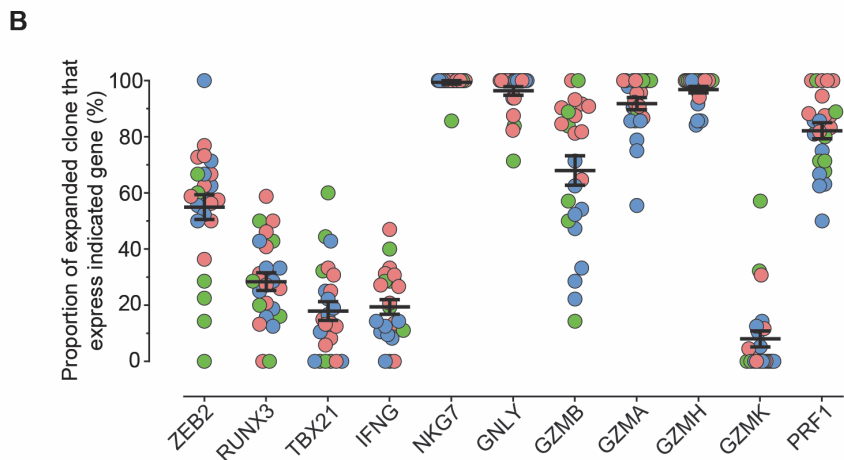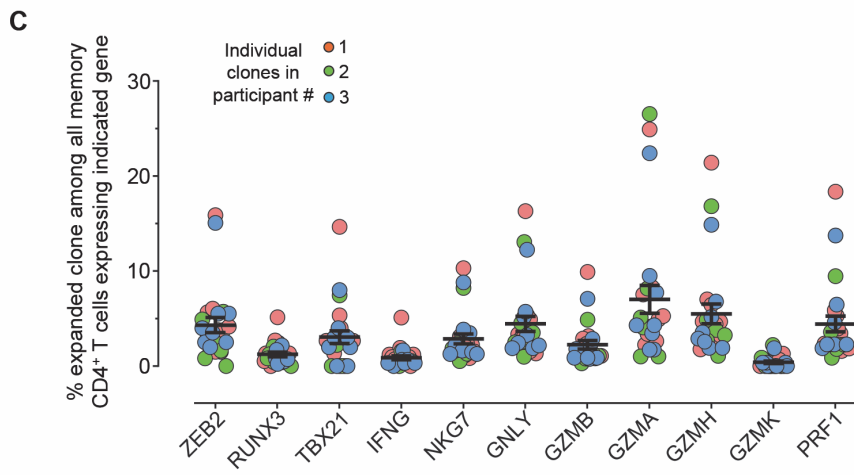

87 **Supplementary Figure 5. Additional characterization of expanded memory CD4<sup>+</sup> T cell**  
88 **clones of the 3 protected participants: (A)** Variable region sequences of the TCR $\alpha$  and TCR $\beta$   
89 chains in expanded memory CD4<sup>+</sup> T cell clones and their frequencies in protected malaria  
90 participants (n=3), defined by single-cell TCR-seq. **(B)** Relative expression of indicated gene in  
91 each individual expanded memory CD4<sup>+</sup> T cell clone. **(C)** Frequency of expanded memory CD4<sup>+</sup>  
92 T cell clone among all memory CD4<sup>+</sup> T cells that express the indicated gene in the 3 protected  
93 participants.

**A Characteristics of study subjects for AIM assay**

| Variable                    | Median and IQR<br>n=15 |
|-----------------------------|------------------------|
| Age, (yr)                   | 5.2 (2.9-9)            |
| Sex (% female)              | 33                     |
| Number symptomatic events   | 1 (0-3)                |
| Number all recurrent events | 6 (3-9)                |

#Symptomatic malaria  $\geq$  2500 parasites/ul and  $\geq$  37.5°C

**B Gated on ZEB2<sup>+</sup> memory CD4<sup>+</sup> T cells:**

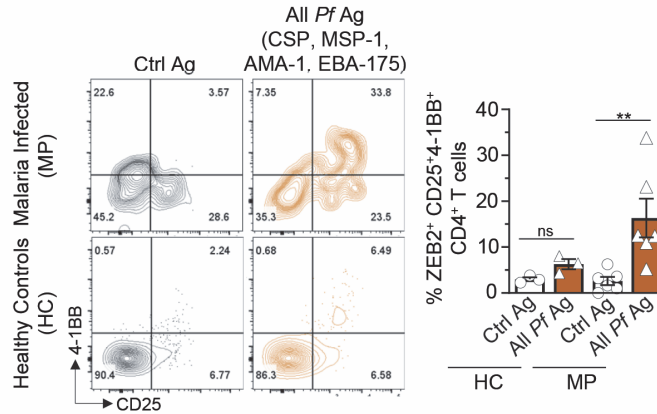

**C Gated on ZEB2<sup>neg</sup> memory CD4<sup>+</sup> T cells:**

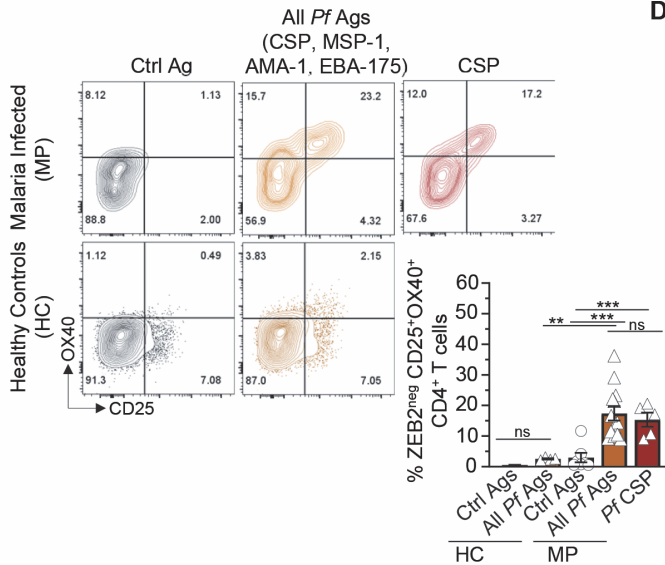

**D**

| Lineage                      |                | Other      |                  |
|------------------------------|----------------|------------|------------------|
| Marker                       | Tag            | Marker     | Tag              |
| CD3                          | AF532          | CCR6       | BV711            |
| CD4                          | Pacific Orange | CX3CR1     | PE Dazzle 594    |
| CD14                         | Qdot-705       | CXCR3      | BV650            |
| CD45                         | Qdot-800       | CXCR5      | Super Bright 436 |
| CD19                         | BUV737         | CD25       | PE-Cy5           |
| CD27                         | PerCP          | CD39       | APC Fire750      |
| CD45RO                       | BV570          | CD62L      | BV480            |
| <b>Transcription factors</b> |                | CD127      | BUV750           |
| Marker                       | Tag            | IgG        | BUV395           |
| ZEB2                         | AF700          | Granzyme B | PE-Cy5.5         |
|                              |                | ICOS       | AF488            |
|                              |                | LAG3       | PE-Cy7           |
|                              |                | PD-1       | BB515            |
|                              |                | OX40       | BB700            |
|                              |                | TIGIT      | BV605            |
|                              |                | Live/Dead  | Zombie NIR       |

**E**

**Characteristics of study subjects analyzed during repeated infection**

| Variable                    | Not gaining protection<br>(n=6) | Gaining protection<br>(n=5) | P value |
|-----------------------------|---------------------------------|-----------------------------|---------|
| Age, (yr)                   | 2.7 (1.6-4.4)                   | 6.2 (4.6-7.6)               | 0.026   |
| Sex (% female)              | 50                              | 50                          | >0.999† |
| Number symptomatic events   | 4.5 (2.5-5.3)                   | 1.0 (1.0-1.3)               | 0.015   |
| Number all recurrent events | 11.5 (8.5-13.5)                 | 8 (4.5-11)                  | 0.093   |

\*Median and IQR

† Fisher's exact test

#Symptomatic malaria  $\geq$  2500 parasites/ul and  $\geq$  37.5°C

95 **Supplementary Figure 6. AIM assay on ZEB2<sup>+</sup> and ZEB2<sup>neg</sup> memory CD4<sup>+</sup> T cells in**  
96 **participants during illness: (A)** Table summarizing the characteristics of the study participants  
97 whose PBMC were used for the AIM assay. **(B)** Representative FACS dot plots of CD25 and 4-  
98 1BB expression by ZEB2<sup>+</sup> memory CD4<sup>+</sup> T cells in i) Healthy controls (HC) stimulated with  
99 control antigen (ctrl Ag) (n=3) or all *Pf* Ag (Circumsporozoite Protein (CSP), Merozoite Surface  
100 Protein-1 (MSP-1), Apical Membrane Antigen 1 (AMA-1), Erythrocyte Binding Antigen 175  
101 (EBA-175) (n=3) and in ii) Malaria Patients (MP) stimulated with ctrl Ag (n=6) or all *Pf* Ag  
102 (n=6). **(C)** Representative FACS dot plots of CD25 and OX40 expression by ZEB2<sup>neg</sup> memory  
103 CD4<sup>+</sup> T cells in i) HC stimulated with ctrl Ag (n=3) or all *Pf* Ag (n=4) and in ii) MP ctrl Ag  
104 (n=7), all *Pf* Ag (n=13) or *Pf*CSP (n=5). Bar graphs pool 3 independent experiments across  
105 distinct participants, each symbol is one participant. Two-sided Student's t-test was conducted  
106 between indicated groups ns- non-significant, \*p<0.05, \*\*p<0.01, \*\*\*p<0.001. **(D)** Spectral flow  
107 cytometry panel (Aurora, Cytex) used for phenotypic characterization of PBMCs in Figures 7  
108 and 8. **(E)** Table summarizing the characteristics of the study participants who gain or do not  
109 gain clinical immunity during the study.
