# Supplementary material for: Cytolytic circumsporozoite-specific memory CD4+ T cell clones are expanded during Plasmodium falciparum infection
Source: PubMed Central journal article supplement (PMC10673885; doi:10.1038/s41467-023-43376-y), 2023-11-25
Supplement: 41467_2023_43376_MOESM3_ESM.pdf [file 41467_2023_43376_MOESM3_ESM.pdf]

## Description of Additional Supplementary Files

File Name: Supplementary Data 1

Description: List of IgG reactive *Pf* antigens.

File Name: Supplementary Data 2

Description: List of *Pf*-reactive antigens between patient's groups.

File Name: Supplementary Data 3

Description: List of IgG-specific *Pf* antigens with greater reactivity in protected compared to susceptible children.

File Name: Supplementary Data 4

Description: List of antibodies for CyTOF, spectral flow cytometry and AIM assay.

File Name: Supplementary Data 5

Description: List of expressed genes in naive and memory CD4<sup>+</sup> T cell clusters defined by single cell transcriptomic.

File Name: Supplementary Code 1

Description: Detailed script used in R software for the single cell analysis.
